# Supplementary material for: Expression Patterns and Molecular Mechanisms Regulating Drought Tolerance of Soybean [Glycine max (L.) Merr.] Conferred by Transcription Factor Gene GmNAC19
Source: MDPI journal article supplement (doi:10.3390/ijms25042396), 2024-02-18
Supplement: s1 [file s1]

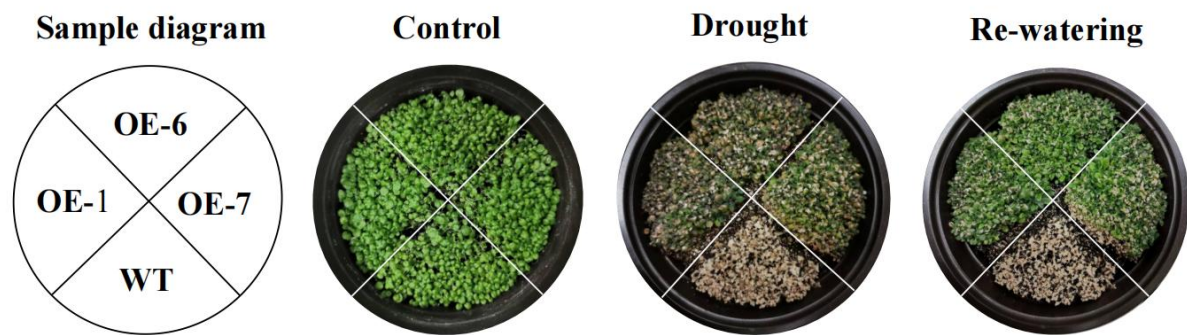

**Figure S1.** Drought resistance of wild type (WT) and three lines of transgenic *Arabidopsis thaliana* plants with overexpression of *GmNAC19* (OE-1, OE-6, and OE-7) under normal growth condition (control), drought stress (i.e., treatment of 6% PEG6000), and recovery of drought stress by re-watering, showing the representative images based on three biological replicates.
